# Supplementary material for: Atmospheric chemistry of ethers, esters, and alcohols on the lifetimes, temperature dependence, and kinetic isotope effect: an example of CF3CX2CX2CX2OX with OX reactions (X = H, D)
Source: Royal Society of Chemistry journal article supplement (doi:10.1039/c6ra04902h), 2016-01-01
Supplement: c6ra04902h1.pdf [file c6ra04902h1.pdf]

- (1) Wu, J. Y.; Liu, J. Y.; Li, Z. S.; Sun, C. C., Theoretical Study of The Reactions of  $\text{CF}_3\text{OCHF}_2$  with The Hydroxyl Radical and the Chlorine Atom. *Chemphyschem* **2004**,*5*, 1336–1344.
- (2) Chandra, A. K., Theoretical Studies on the Kinetics and Mechanism of the Gas-phase Reactions of  $\text{CHF}_2\text{OCHF}_2$  with OH Radicals. *J. Mol. Model.* **2012**,*18*, 4239–4247.
- (3) Jogeshwari Devi, K.; Chandra, A. K., Theoretical Study of the Gas-phase Reactions of  $\text{CHF}_2\text{OCHF}_2$  (HFE-134) with Cl Atoms. *Curr. Sci.* **2012**,*102*, 470-477.
- (4) Gour, N. K.; Deka, R. C.; Singh, H. J.; Mishra, B. K., Theoretical Study on the Gas-phase Reactions of Ethyl Butyrate with OH Radicals at 298 K. *Monatsh. Chem.* **2014**,*145*, 1759–1767.
- (5) Lily, M.; Sutradhar, D.; Chandra, A. K., Theoretical Investigations on Kinetics, Mechanism and Thermochemistry of the Gas Phase Reactions of  $\text{CHF}_2\text{OCF}_2\text{CHF}_2$  with OH Radicals. *Comput. Theor. Chem.* **2013**,*1022*, 50–58.
- (6) Deka, R. C.; Mishra, B. K., Theoretical Studies on Kinetics, Mechanism and Thermochemistry of Gas-phase Reactions of HFE-449mec-f with OH Radicals and Cl Atom. *J. Mol. Graphics Modell.* **2014**,*53*, 23–30.
- (7) Deka, R. C.; Mishra, B. K., A Theoretical Investigation on the Kinetics, Mechanism and Thermochemistry of Gas-phase Reactions of Methyl Acetate with Chlorine Atoms at 298 K. *Chem. Phys. Lett.* **2014**,*595–596*, 43–47.
- (8) Srinivasulu, G.; Rajakumar, B., Theoretical Investigations on the Kinetics of H-abstraction Reactions from  $\text{CF}_3\text{CH}(\text{OH})\text{CF}_3$  by OH Radicals. *J. Phys. Chem. A* **2013**,*117*, 4534–4544.
- (9) Mishra, B. K., Computational Study on Kinetics and Mechanism of Cl-initiated Hydrogen Abstraction of Methyl Fluoroacetate. *J. Fluor. Chem.* **2015**,*172*, 74-79.
- (10) Mishra, B. K.; Chakrabartty, A. K.; Deka, R. C., Theoretical Investigation of the Gas-phase Reactions of  $\text{CF}_2\text{ClC}(\text{O})\text{OCH}_3$  with the Hydroxyl Radical and the Chlorine Atom at 298 K. *J. Mol. Model.* **2013**,*19*, 3263–3270.
- (11) Mishra, B. K.; Chakrabartty, A. K.; Deka, R. C., A Theoretical Investigation on the Kinetics and Reactivity of the Gas-phase Reactions of Ethyl Chlorodifluoroacetate with OH Radical and Cl Atom at 298 K. *Struct. Chem.* **2014**,*25*, 463–470.
- (12) Deka, R. C.; Mishra, B. K., Theoretical Investigation of the Atmospheric Chemistry of Methyl Difluoroacetate: Reaction with Cl Atoms and Fate of Alkoxy Radical at 298 K. *Struct. Chem.* **2014**,*25*, 1475–1482.
- (13) Singh, H. J.; Gour, N. K.; Rao, P. K.; Tiwari, L., Theoretical Investigation on the Kinetics and Branching Ratio of the Gas Phase Reaction of Sevoflurane with Cl atom. *J. Mol. Model.* **2013**,*19*, 4815–4822.
- (14) Mishra, B. K.; Singh, H. J.; Tiwari, L., Theoretical Investigation on Mechanism and Kinetics of the Cl-initiated Hydrogen Abstraction Reactions of Ethyl Trifluoroacetate at 298 K. *J. Mol. Model.* **2014**,*20*, 2475.
- (15) Lily, M.; Chandra, A. K., Theoretical Studies on Atmospheric Chemistry of  $(\text{CF}_3)_2\text{C}(\text{OH})\text{CH}_3$ : Kinetics, Mechanism and Thermochemistry of Gas Phase Reactions with OH Radicals. *J. Fluor. Chem.* **2015**,*175*, 185–192.
- (16) Lily, M.; Chandra, A. K., Theoretical Investigation on Kinetics and Thermochemistry of Reaction of  $\text{CHF}_2\text{CF}_2\text{OCH}_2\text{CF}_3$  with OH Radicals and Global Warming Potentials. *Mol. Phys.* **2015**,*113*, 508–520.
- (17) Mishra, B. K.; Chakrabartty, A. K.; Bhattacharjee, D.; Deka, R. C., Theoretical Study on the Kinetics and Branching Ratios of the Gas Phase Reactions of 1, 1-Dichlorodimethylether

- 
- (DCDME) with Cl Atom. *Struct. Chem.* **2013**,*24*, 1621–1626.
- (18) Liu, F. Y.; Long, Z. W.; Tan, X. F.; Long, B., The Reaction Mechanisms and Kinetics of  $\text{CF}_3\text{CHFOCH}_3$  and  $\text{CHF}_2\text{CHFOCF}_3$  with Atomic Chlorine: A Computational Study. *J. Mol. Model.* **2014**,*20*, 2435.
- (19) Singh, H. J.; Rao, P. K.; Tiwari, L., Theoretical Studies on OH and Cl Initiated Hydrogen Atom Abstraction of HFE-227pc ( $\text{CF}_3\text{OCF}_2\text{CHF}_2$ ). *J. Atmos. Chem.* **2013**,*70*, 257–268.
- (20) Zhu, P.; Ai, L. L.; Wang, H.; Liu, J. Y., Theoretical Studies on Mechanism and Kinetics of the Hydrogen-Abstraction Reaction of  $\text{CF}_2\text{HCOOCH}_3$  with OH Radicals. *Comput. Theor. Chem.* **2014**,*1029*, 91–98.
- (21) Zhang, H.; Liu, Y.; Liu, J.-Y.; Li, Z.-S., Theoretical Study and Rate Constants Calculation for the Reactions  $\text{X} + \text{CF}_3\text{CH}_2\text{OCF}_3$  ( $\text{X} = \text{F}, \text{Cl}, \text{Br}$ ). *J. Comput. Chem.* **2012**,*33*, 685–690.
- (22) Singh, H. J.; Mishra, B. K.; Rao, P. K., Hydrogen-Atom Abstraction Reaction of  $\text{CF}_3\text{CH}_2\text{OCF}_3$  by Hydroxyl Radical. *Bull. Kor. Chem. Soc.* **2010**,*31*, 3718–3722.
- (23) Yang, L.; Liu, J. Y.; and Li, Z. S., Theoretical Studies of the Reaction of Hydroxyl Radical with  $\text{CH}_3\text{C}(\text{O})\text{OCH}_3$ . *J. Phys. Chem. A* **2008**, *112*, 6364–6372.
- (24) Ren, H.; Yang, X.; Li, X.; Liu, Y.; Wei, X., The Hydrogen Abstraction Reaction Mechanism and Rate Constants from 200K to 2000 K Between Sevoflurane and Chlorine Atom: A Theoretical Investigation. *Chem. Phys. Lett.* **2014**,*605–606*, 28–34.
- (25) Mishra, B. K.; Deka, R. C., A Theoretical Investigation on Kinetics, Mechanism, and Thermochemistry of the Gas-Phase Reactions of Methyl Fluoroacetate with OH Radicals and Fate of Alkoxy Radical. *J. Phys. Chem. A* **2014**,*118*, 8779–8786.
- (26) Singh, H. J.; Tiwari, L.; Rao, P. K., Computational Study on the Kinetics of OH Initiated Oxidation of Methyl Difluoroacetate ( $\text{CF}_2\text{HCOOCH}_3$ ). *Mol. Phys.* **2013**,*112*, 1892–1898.
- (27) Chakrabartty, A. K.; Mishra, B. K.; Bhattacharjee, D.; Deka, R. C., Mechanistic and Kinetics Study of the Gas Phase Reactions of Methyltrifluoroacetate with OH Radical and Cl Atom. *Mol. Phys.* **2013**,*111*, 860–867.
- (28) Wang, L.; Wen, J.; He, H.; Zhang, J., The Mechanism and Dynamic Studies for the Reactions of OH Radical with  $\text{CH}_{3-n}\text{F}_n\text{OCF}_2\text{CHFCl}$  ( $n=0, 1, \text{ and } 2$ ). *J. Fluor. Chem.* **2014**,*164*, 1–9.
- (29) Rao, P. K.; Singh, H. J., Kinetics and Mechanism of Gas-Phase Reaction of  $\text{CF}_3\text{OCH}_2\text{CH}_3$  (HFE-263) with the OH Radical-A Theoretical Study. *Can. J. Chem.* **2015**,*93*, 303–310.
- (30) Yang, L.; He, H.-Q.; Ji, Y.-M.; Liu, J.-Y.; Li, Z.-S., Direct Ab Initio Dynamics Calculations of the Rate Constants for the Reaction of  $\text{CHF}_2\text{CF}_2\text{OCH}_3$  with Cl. *Int. J. Chem. Kinet.* **2007**,*39*, 221–230.
- (31) Zierkiewicz, W., Reaction of Volatile Anaesthetic Desflurane with Chlorine Atom. Theoretical Investigation. *Chem. Phys. Lett.* **2013**,*555*, 72–78.
- (32) Singh, H. J.; Tiwari, L.; Rao, P. K., Computational Study on OH and Cl Initiated Oxidation of 2,2,2-Trifluoroethyl Trifluoroacetate ( $\text{CF}_3\text{C}(\text{O})\text{OCH}_2\text{CF}_3$ ). *Bull. Kor. Chem. Soc.* **2014**,*35*, 1385–1390.
- (33) Gour, N. K.; Deka, R. C.; Singh, H. J.; Mishra, B. K., Theoretical Studies on Kinetics, Mechanism and Thermochemistry of Gas-Phase Reactions of  $\text{CF}_3\text{CHFCF}_2\text{OCF}_3$  with OH Radicals and Cl Atoms and Fate of Alkoxy Radical at 298 K. *J. Fluor. Chem.* **2014**,*166*, 110–116.
- (34) Espinosa-García, J., Ab Initio and Variational Transition-State Theory Study of the  $\text{CF}_3\text{CF}_2\text{OCH}_3 + \text{OH}$  Reaction Using Integrated Methods: Mechanism and Kinetics. *J. Phys. Chem. A* **2003**,*107*, 1618–1626.

- 
- (35) Wang, L.; Zhang, T.; Wen, J.; He, H.; Zhang, J., Theoretical Study on Dynamics of the Gas Phase Reactions of  $\text{CF}_3\text{CF}_2\text{CH}_2\text{OCHF}_2$  with OH Radicals. *J. Fluor. Chem.* **2014**, *168*, 25–33.
- (36) Mishra, B. K.; Lily, M.; Chakrabarty, A. K.; Deka, R. C.; Chandra, A. K., A DFT Study on Kinetics of the Gas Phase Reactions of  $\text{CH}_3\text{CH}_2\text{OCF}_3$  with OH Radicals and Cl Atoms. *J. Fluor. Chem.* **2014**, *159*, 57–64.
- (37) Gour, N. K.; Deka, R. C.; Singh, H. J.; Mishra, B. K., A Computational Perspective on Mechanism and Kinetics of the Reactions of  $\text{CF}_3\text{C}(\text{O})\text{OCH}_2\text{CF}_3$  with OH Radicals and Cl Atoms at 298K. *J. Fluor. Chem.* **2014**, *160*, 64–71.
- (38) Lily, M.; Mishra, B. K.; Chandra, A. K., Kinetics, Mechanism and Thermochemistry of the Gas Phase Reactions of  $\text{CF}_3\text{CH}_2\text{OCH}_2\text{CF}_3$  with OH Radicals: A Theoretical Study. *J. Fluor. Chem.* **2014**, *161*, 51–59.
- (39) Zhang, H.; Liu, C. Y.; Zhang, G. L.; Hou, W. J.; Sun, M.; Liu, B.; Li, Z. S., Theoretical studies of the reactions of Cl atoms with  $\text{CF}_3\text{CH}_2\text{OCH}_n\text{F}_{(3-n)}$  ( $n = 1, 2, 3$ ). *Theor. Chem. Acc.* **2010**, *127*, 551–560.
- (40) Zhu, P.; Duan, X. M.; Liu, J. Y., Theoretical Studies on Mechanism and Kinetics of the Hydrogen-Abstraction Reaction of  $\text{CF}_3\text{C}(\text{O})\text{OCH}_2\text{CH}_3$  with OH Radicals. *J. Fluor. Chem.* **2015**, *176*, 61–70.

**Table S1a.** Comparison of the  $k_{\text{OH}}$  and  $k_{\text{Cl}}$  at  $298 \pm 2$  K, methods, and lifetime ( $\tau_{\text{OH}}$ ,  $\tau_{\text{Cl}}$ ,  $\tau_{\text{eff}}$ ) for the existing ethers in theory. (Blue font is obtained from this paper. Black font is obtained from the reference)

| Ethers                                                                            | $k_{\text{OH}}$        | Methods          | $k_{\text{Cl}}$        | Methods          | $\tau_{\text{OH}}$ (years) | $\tau_{\text{Cl}}$ (years) | $\tau_{\text{eff}}$ (years) |
|-----------------------------------------------------------------------------------|------------------------|------------------|------------------------|------------------|----------------------------|----------------------------|-----------------------------|
| CH <sub>3</sub> OCH <sub>3</sub>                                                  | 2.15×10 <sup>-12</sup> | CVT/SCT MP2      |                        |                  | 0.015                      |                            |                             |
| CH <sub>3</sub> OCF <sub>3</sub>                                                  | 1.22×10 <sup>-14</sup> | CVT/SCT MP2      |                        |                  | 2.60                       |                            |                             |
| CF <sub>3</sub> OCHF <sub>2</sub>                                                 | 3.38×10 <sup>-16</sup> | CVT/SCT B3LYP    | 2.80×10 <sup>-17</sup> | CVT/SCT B3LYP    | 93.82                      | 1.13×10 <sup>5</sup>       | 93.74                       |
| CHF <sub>2</sub> OCHF <sub>2</sub>                                                | 2.40×10 <sup>-15</sup> | CTST MPWB1K      | 6.1×10 <sup>-16</sup>  | CTST MPWBK       | 12                         | 5198.33                    | 15                          |
| CH <sub>2</sub> FOCH <sub>2</sub> F                                               | 6.06×10 <sup>-16</sup> | CVT/SCT B3LYP    |                        |                  | 52.33                      |                            |                             |
| CH <sub>3</sub> OCHCl <sub>2</sub>                                                | 2.03×10 <sup>-13</sup> | CVT/SCT BH&HLYP  | 1.20×10 <sup>-12</sup> | CVT/SCT BH&HLYP  | 0.156                      | 2.642                      | 0.147                       |
| CH <sub>3</sub> OCH <sub>2</sub> CH <sub>3</sub>                                  | 5.00×10 <sup>-12</sup> | CVT/SCT B3LYP    |                        |                  | 0.0063                     |                            |                             |
| CH <sub>3</sub> OCHF <sub>2</sub> CF <sub>3</sub>                                 | 9.01×10 <sup>-14</sup> | CVT/SCT MP2      | 1.39×10 <sup>-10</sup> | CVT BH&HLYP      | 0.352                      | 0.023                      | 0.021                       |
| CH <sub>3</sub> OCH <sub>2</sub> CF <sub>3</sub>                                  | 2.17×10 <sup>-12</sup> | CTST MPWB1K      | 2.55×10 <sup>-11</sup> | CVT/SCT MP2      | 0.066                      | 0.124                      | 0.043                       |
| CH <sub>3</sub> OCF <sub>2</sub> CHF <sub>2</sub>                                 |                        |                  | 2.41×10 <sup>-13</sup> | CVT/SCT B3LYP    |                            | 13.16                      |                             |
| CH <sub>2</sub> FOCH <sub>2</sub> CF <sub>3</sub>                                 |                        |                  | 5.85×10 <sup>-9</sup>  | CVT/SCT MP2      |                            | 5.42×10 <sup>-4</sup>      |                             |
| CH <sub>2</sub> FOCF <sub>2</sub> CHFCl                                           | 1.20×10 <sup>-14</sup> | CVT/SCT BMK      |                        |                  | 2.64                       |                            |                             |
| CH <sub>3</sub> OCF <sub>2</sub> CHFCl                                            | 2.00×10 <sup>-14</sup> | CVT/SCT BMK      |                        |                  | 1.58                       |                            |                             |
| CH <sub>3</sub> OCF <sub>2</sub> CF <sub>3</sub>                                  |                        |                  | 6.84×10 <sup>-15</sup> | CVT/SCT MP2      |                            | 4.8                        |                             |
| CHF <sub>2</sub> OCF <sub>2</sub> CHFCl                                           | 9.08×10 <sup>-15</sup> | CVT/SCT BMK      | 2.90×10 <sup>-15</sup> | CVT/SCT B3LYP    | 3.49                       | 1093.44                    | 3.48                        |
| CHF <sub>2</sub> OCF <sub>2</sub> CHF <sub>2</sub>                                | 1.01×10 <sup>-15</sup> | CTST MPWB1K      |                        |                  | 35                         |                            |                             |
| CHF <sub>2</sub> OCHClCF <sub>3</sub>                                             | 2.51×10 <sup>-14</sup> | CVT/SCT B3LYP    | 6.67×10 <sup>-15</sup> | CVT/SCT B3LYP    | 1.26                       | 475.41                     | 1.256                       |
| CHF <sub>2</sub> OCHF <sub>2</sub> CF <sub>3</sub>                                | 7.06×10 <sup>-15</sup> | CVT/SCT B3LYP    | 1.45×10 <sup>-15</sup> | CVT/SCT B3LYP    | 4.49                       | 2186.89                    | 4.48                        |
|                                                                                   |                        |                  | 0.11×10 <sup>-15</sup> | CTST wB97XD      |                            | 2.88×10 <sup>4</sup>       |                             |
| CHF <sub>2</sub> OCF <sub>2</sub> CH <sub>2</sub> F                               | 6.74×10 <sup>-15</sup> | CVT/SCT B3LYP    |                        |                  | 4.7                        |                            |                             |
| CHF <sub>2</sub> OCH <sub>2</sub> CF <sub>3</sub>                                 | 2.38×10 <sup>-13</sup> | CVT/SCT B3LYP    | 2.38×10 <sup>-14</sup> | CVT/SCT B3LYP    | 0.133                      | 133.23                     | 0.1328                      |
|                                                                                   |                        |                  | 3.99×10 <sup>-14</sup> | CVT/SCT MP2      |                            | 79.47                      |                             |
| CF <sub>3</sub> OCH <sub>2</sub> CH <sub>3</sub>                                  | 5.30×10 <sup>-14</sup> | CTST MPWB1K      | 7.78×10 <sup>-13</sup> | CTST MPWB1K      | 0.598                      | 4.075                      | 0.521                       |
|                                                                                   | 7.6×10 <sup>-14</sup>  | CTST M06-2X      |                        |                  | 0.417                      |                            |                             |
| CF <sub>3</sub> OCHF <sub>2</sub> CHF <sub>2</sub>                                | 6.64×10 <sup>-15</sup> | CVT/SCT B3LYP    | 4.27×10 <sup>-15</sup> | CVT/SCT BH&HLYP  | 4.77                       | 742.61                     | 4.74                        |
| CF <sub>3</sub> OCHF <sub>2</sub> CF <sub>3</sub>                                 | 1.30×10 <sup>-15</sup> | ICVT/SCT BH&HLYP | 3.06×10 <sup>-17</sup> | ICVT/SCT BH&HLYP | 24.39                      | 1.04×10 <sup>5</sup>       | 24.38                       |
| CF <sub>3</sub> OCH <sub>2</sub> CHF <sub>2</sub>                                 | 2.74×10 <sup>-14</sup> | CVT/SCT B3LYP    |                        |                  | 1.16                       |                            |                             |
| CF <sub>3</sub> OCH <sub>2</sub> CF <sub>3</sub>                                  | 5.47×10 <sup>-12</sup> | CTST B3LYP       | 7.19×10 <sup>-15</sup> | CVT/SCT MP2      | 0.0058                     | 441.03                     | 0.0057                      |
| CF <sub>3</sub> OCF <sub>2</sub> CHF <sub>2</sub>                                 | 1.50×10 <sup>-15</sup> | CTST MPWB1K      | 5.30×10 <sup>-17</sup> | CTST MPWB1K      | 21.14                      |                            |                             |
| CF <sub>3</sub> OCF <sub>2</sub> CHF <sub>2</sub> CF <sub>3</sub>                 | 1.22×10 <sup>-15</sup> | CTST M06-2X      | 3.40×10 <sup>-17</sup> | CTST M06-2X      | 25.99                      | 9.33×10 <sup>4</sup>       | 38.5                        |
| CH <sub>3</sub> OCH <sub>2</sub> CF <sub>2</sub> CF <sub>3</sub>                  | 3.59×10 <sup>-13</sup> | CTST M06-2X      |                        |                  | 0.115                      |                            |                             |
| CH <sub>3</sub> OCF <sub>2</sub> CF <sub>2</sub> CF <sub>3</sub>                  | 7.76×10 <sup>-15</sup> | CTST M06-2X      | 4.67×10 <sup>-14</sup> | CTST M06-2X      | 4.09                       | 67.90                      | 4.4                         |
| CF <sub>3</sub> CH <sub>2</sub> OCH <sub>2</sub> CF <sub>3</sub>                  | 1.32×10 <sup>-13</sup> | CTST M06-2X      |                        |                  | 0.272                      |                            |                             |
| (CF <sub>3</sub> ) <sub>2</sub> CHOCH <sub>2</sub> F                              | 3.68×10 <sup>-14</sup> | CTST M06-2X      | 1.10×10 <sup>-13</sup> | CTST BH&HLYP     | 5.99                       | 28.83                      | 4.96                        |
|                                                                                   |                        |                  | 2.60×10 <sup>-13</sup> | CTST wB97XD      |                            | 12.20                      |                             |
| (CF <sub>3</sub> ) <sub>2</sub> CHOCH <sub>3</sub>                                | 1.88×10 <sup>-13</sup> | CTST MPWB1K      |                        |                  | 0.189                      |                            |                             |
| (CF <sub>3</sub> ) <sub>2</sub> CFOCH <sub>3</sub>                                | 1.25×10 <sup>-14</sup> | CVT/SCT B3LYP    | 1.34×10 <sup>-14</sup> | CVT/SCT B3LYP    | 2.54                       | 236.64                     | 2.51                        |
| CHF <sub>2</sub> OCH <sub>2</sub> CF <sub>2</sub> CF <sub>3</sub>                 | 9.05×10 <sup>-15</sup> | CVT/SCT BMK      |                        |                  | 3.50                       |                            |                             |
| CHF <sub>2</sub> CF <sub>2</sub> OCH <sub>2</sub> CF <sub>3</sub>                 | 1.01×10 <sup>-14</sup> | CTST M06-2X      |                        |                  | 4.50                       |                            |                             |
| CF <sub>3</sub> CH <sub>2</sub> OCF <sub>2</sub> CHF <sub>2</sub> CF <sub>3</sub> | 9.10×10 <sup>-15</sup> | CTST M06-2X      | 4.77×10 <sup>-17</sup> | CTST M06-2X      | 3.48                       | 6.65×10 <sup>4</sup>       | 3.479                       |

**Table S1b.** Comparison of the  $k_{\text{OH}}$  and  $k_{\text{Cl}}$  at  $298 \pm 2$  K, methods, and lifetime ( $\tau_{\text{OH}}$ ,  $\tau_{\text{Cl}}$ ,  $\tau_{\text{eff}}$ ) for the existing esters in theory. (Blue font is obtained from this paper. Black font is obtained from the reference)

| Esters                                                | $k_{\text{OH}}$        | Methods         | $k_{\text{Cl}}$        | Methods       | $\tau_{\text{OH}}$ (days) | $\tau_{\text{Cl}}$ (years) | $\tau_{\text{eff}}$ (years) |
|-------------------------------------------------------|------------------------|-----------------|------------------------|---------------|---------------------------|----------------------------|-----------------------------|
| $\text{CH}_3\text{COOCH}_3$                           | $3.26 \times 10^{-13}$ | CVT/SCT MP2     | $2.61 \times 10^{-12}$ | CTST MPWB1K   | 35.50                     | 0.121                      | 0.054                       |
| $\text{CF}_2\text{HCOOCH}_3$                          | $6.06 \times 10^{-14}$ | ICVT/SCT M06-2X | $1.18 \times 10^{-13}$ | CVT/SCT B3LYP | 190.99                    | 26.87                      | 0.513                       |
|                                                       | $1.38 \times 10^{-14}$ | CTST MPWB1K     | $1.95 \times 10^{-13}$ | CTST MPWB1K   | 42                        | 16                         | 0.114                       |
| $\text{CH}_2\text{FCOOCH}_3$                          | $2.44 \times 10^{-13}$ | CTST MPWB1K     | $2.62 \times 10^{-13}$ | CTST MPWB1K   | 24                        | 12.10                      | 1.21                        |
| $\text{CF}_3\text{COOCH}_3$                           | $4.05 \times 10^{-14}$ | CVT/SCT B3LYP   | $8.75 \times 10^{-14}$ | CVT/SCT B3LYP | 285.78                    | 36.24                      | 0.766                       |
|                                                       | $5.50 \times 10^{-14}$ | CTST MPWB1K     | $5.90 \times 10^{-14}$ | CTST MPWB1K   | 210.44                    | 53.75                      | 0.570                       |
| $\text{CF}_2\text{ClCOOCH}_3$                         | $9.10 \times 10^{-14}$ | CTST MPWB1K     | $1.20 \times 10^{-12}$ | CTST MPWB1K   | 127.19                    | 2.64                       | 0.389                       |
| $\text{CF}_3\text{COOCH}_2\text{CH}_3$                | $7.00 \times 10^{-13}$ | ICVT/SCT M06-2X | $9.96 \times 10^{-13}$ | CVT/SCT B3LYP | 16.53                     | 3.18                       | 0.045                       |
|                                                       |                        |                 | $1.60 \times 10^{-12}$ | CTST MPWB1K   |                           | 1.98                       | 0.044                       |
| $\text{CF}_2\text{ClCOOCH}_2\text{CH}_3$              | $5.09 \times 10^{-13}$ | CTST MPWB1K     | $1.86 \times 10^{-12}$ | CTST MPWB1K   | 22.74                     | 1.70                       | 0.066                       |
| $\text{CF}_3\text{COOCH}_2\text{CF}_3$                | $5.30 \times 10^{-13}$ | CTST MPWB1K     | $2.00 \times 10^{-14}$ | CTST MPWB1K   | 21.84                     | 158.55                     | 0.060                       |
|                                                       | $1.20 \times 10^{-13}$ | CTST M06-2X     | $9.80 \times 10^{-16}$ | CTST M06-2X   | 96.45                     | 3235.69                    | 0.15                        |
| $\text{CH}_3(\text{CH}_2)_2\text{COOCH}_2\text{CH}_3$ | $4.87 \times 10^{-12}$ | CTST M06-2X     |                        |               | 2.37                      |                            |                             |

**Table S1c.** Comparison of the  $k_{\text{OH}}$  and  $k_{\text{Cl}}$  at  $298 \pm 2$  K, methods, and lifetime ( $\tau_{\text{OH}}$ ,  $\tau_{\text{Cl}}$ ,  $\tau_{\text{eff}}$ ) for the existing alcohols in theory. (Blue font is obtained from this paper. Black font is obtained from the reference)

| alcohols                                                     | $k_{\text{OH}}$        | Methods        | $k_{\text{Cl}}$        | Methods         | $\tau_{\text{OH}}$ (days) | $\tau_{\text{Cl}}$ (years) | $\tau_{\text{eff}}$ (years) |
|--------------------------------------------------------------|------------------------|----------------|------------------------|-----------------|---------------------------|----------------------------|-----------------------------|
| CH <sub>3</sub> OH                                           | 6.82×10 <sup>-13</sup> | CTST BH&HLYP   |                        |                 | 16.97                     |                            |                             |
|                                                              | 7.97×10 <sup>-13</sup> | VTST MP2       |                        |                 | 14.52                     |                            |                             |
| CF <sub>3</sub> OH                                           | 9.7×10 <sup>-18</sup>  | CTST MP2       |                        |                 | 1.19×10 <sup>6</sup>      |                            |                             |
| CH <sub>3</sub> CH <sub>2</sub> OH                           | 2.40×10 <sup>-12</sup> | CTST BH&HLYP   |                        |                 | 4.82                      |                            |                             |
|                                                              | 2.71×10 <sup>-12</sup> | VTST MP2       |                        |                 | 4.27                      |                            |                             |
| CH <sub>2</sub> FCH <sub>2</sub> OH                          |                        |                | 2.51×10 <sup>-11</sup> | CVT/SCT MP2     |                           | 0.126                      |                             |
| CF <sub>2</sub> HCH <sub>2</sub> OH                          |                        |                | 2.83×10 <sup>-12</sup> | CVT/SCT MP2     |                           | 1.12                       |                             |
| CF <sub>3</sub> CH <sub>2</sub> OH                           | 9.89×10 <sup>-14</sup> | CVT/SCT B3LYP  | 6.05×10 <sup>-13</sup> | CVT/SCT MP2     | 117.03                    | 5.24                       | 0.302                       |
| CF <sub>3</sub> CH(OH)CF <sub>3</sub>                        | 3.54×10 <sup>-14</sup> | CVT/SCT M06-2X |                        |                 | 441.65                    |                            |                             |
|                                                              | 2.01×10 <sup>-14</sup> | CVT/SCT B3LYP  |                        |                 | 575.82                    |                            |                             |
| <i>n</i> -CH <sub>3</sub> CH <sub>2</sub> CH <sub>2</sub> OH | 4.04×10 <sup>-12</sup> | CTST BH&HLYP   |                        |                 | 2.86                      |                            |                             |
| <i>i</i> -CH <sub>3</sub> CH <sub>2</sub> CH <sub>2</sub> OH | 4.19×10 <sup>-12</sup> | CTST BH&HLYP   |                        |                 | 2.76                      |                            |                             |
| CF <sub>3</sub> CH <sub>2</sub> CH <sub>2</sub> OH           | 4.70×10 <sup>-13</sup> | CVT/SCT M06-2X |                        |                 | 24.62                     |                            |                             |
| CF <sub>3</sub> CF <sub>2</sub> CH <sub>2</sub> OH           | 8.44×10 <sup>-14</sup> | CVT/SCT B3LYP  | 3.19×10 <sup>-13</sup> | CVT/SCT BH&HLYP | 137.13                    | 9.94                       | 0.362                       |
|                                                              |                        |                | 7.14×10 <sup>-13</sup> | CTST MP2        |                           | 4.44                       |                             |
| CH <sub>3</sub> (CH <sub>2</sub> ) <sub>3</sub> OH           | 6.88×10 <sup>-12</sup> | CTST BH&HLYP   |                        |                 | 1.68                      |                            |                             |
|                                                              | 5.51×10 <sup>-12</sup> | MS-CVT/SCT     |                        |                 | 2.10                      |                            |                             |
|                                                              |                        | MG3S           |                        |                 |                           |                            |                             |
| CF <sub>3</sub> (CH <sub>2</sub> ) <sub>3</sub> OH           | 3.93×10 <sup>-12</sup> | CVT/SCT MP2    |                        |                 | 2.94                      |                            |                             |
| (CF <sub>3</sub> ) <sub>2</sub> C(OH)CH <sub>3</sub>         | 7.46×10 <sup>-15</sup> | CTST M06-2X    |                        |                 | 1825                      |                            |                             |
